1 **Physiological and functional heterogeneity in the mouse locus coeruleus**

2

3 **Running title:** Heterogeneity in the locus coeruleus

4

5 Lucas Silva Tortorelli<sup>1\*</sup>, Jim McBurney-Lin<sup>1,2\*</sup>, Machhindra Garad<sup>1</sup>, Marine Megemont<sup>1</sup>, Martin  
6 Riccomagno<sup>1,2</sup> and Hongdian Yang<sup>1,2</sup>

7

8 <sup>1</sup> Department of Molecular, Cell and Systems Biology, <sup>2</sup> Neuroscience Graduate Program,  
9 University of California, Riverside, CA 92521, USA

10

11 \* Equal contributions

12

13 Correspondence: [hongdian@ucr.edu](mailto:hongdian@ucr.edu)

14

15 **Keywords:** heterogeneity, locus coeruleus, mouse, pupil diameter

16

17 **Abstract**

18

19 Neurons in the locus coeruleus (LC) have been traditionally viewed as a homogenous population.  
20 Recent studies are beginning to uncover heterogeneous molecular phenotypes and projection  
21 targets in this nucleus, but how such heterogeneity is ultimately manifested in neuronal physiology  
22 and function is largely unknown. We took an orthogonal approach to directly assess the  
23 physiological and functional heterogeneity in the LC. By identifying noradrenergic neurons using  
24 a genetic-based tagging approach, our study revealed a subset of neurons exhibiting a distinctive  
25 narrow spike waveform and lacking the prolonged after-hyperpolarization. We further provided  
26 evidence establishing a link between the proximity of LC neurons and their response latency,  
27 where putatively proximal neurons tended to have a long latency to optogenetic activation. Finally,  
28 we found that response latency of LC neurons was correlated with their burst firing and distinct  
29 relationship with pupil diameter. Together, our study presents novel evidence to reveal and link  
30 LC heterogeneity at the physiological level to that at the functional level.

31

32 **Introduction**

33

34 The noradrenergic nucleus locus coeruleus (LC) is interconnected with many regions in the  
35 nervous system, and has been implicated in a multitude of physiological and cognitive functions  
36 ranging from sleep-wake cycle and sensory perception to attention and memory (Berridge and  
37 Waterhouse, 2003; Aston-Jones and Cohen, 2005; Sara and Bouret, 2012; McBurney-Lin et al.,  
38 2019). Neurons in the LC have been traditionally viewed as a uniform population with  
39 homogenous intrinsic properties and functions (Aston-Jones and Bloom, 1981; Fallon and  
40 Loughlin, 1982; Loughlin et al., 1982; Waterhouse et al., 1993). Recent advances in single cell  
41 profiling and tracing (e.g., (Macosko et al., 2015; Shekhar et al., 2016; Tervo et al., 2016; Zingg  
42 et al., 2020)) have revealed heterogeneity in neuronal populations that were once thought to be  
43 homogeneous. These approaches have also begun to challenge the longstanding view of  
44 homogeneity in the LC (Chandler et al., 2019; Poe et al., 2020), uncovering heterogeneity at  
45 multiple levels including developmental origins, molecular phenotypes and projection targets  
46 (Robertson et al., 2013; Chandler et al., 2014; Schwarz et al., 2015; Keschull et al., 2016;  
47 Kempadoo et al., 2016; Hirschberg et al., 2017; Plummer et al., 2017; Uematsu et al., 2017;  
48 Mulvey et al., 2018; Borodovitsyna et al., 2020). However, how heterogeneity at the subcellular  
49 and anatomical level is ultimately manifested in LC physiology and function is largely unknown  
50 and is under active investigation. In addition, one widely adopted criterion to identify LC neurons  
51 *in vivo* relies on their distinctive wide spike waveforms with prolonged after-hyperpolarization (e.g.,  
52 (Andrade and Aghajanian, 1984; Berridge and Waterhouse, 2003)). Since 'blind' *in vivo*  
53 recordings cannot determine cellular identity, i.e., whether the recorded neurons are indeed  
54 noradrenergic-positive (NA<sup>+</sup>), such inclusion criteria may be biased to sample a subpopulation of  
55 neurons. It is currently unclear whether LC NA<sup>+</sup> neurons ubiquitously exhibit wide spike  
56 waveforms (Totah et al., 2018; Breton-Provencher and Sur, 2019). More importantly, it is currently  
57 unknown whether and how LC physiological diversity underlies any heterogeneity at the functional  
58 level.

59  
60 Deeply situated in the brainstem, the LC poses a great technical challenge for *in vivo* recordings.  
61 Based on anatomical structures and empirical measurements (Breen et al., 1983; Rajkowski et  
62 al., 1994; Murphy et al., 2014; Varazzani et al., 2015; Reimer et al., 2016; Liu et al., 2017; Breton-  
63 Provencher and Sur, 2019; Privitera et al., 2020), pupil diameter has been widely treated as a  
64 noninvasive readout of LC activity (e.g., (Aston-Jones and Cohen, 2005; Gilzenrat et al., 2010;  
65 Preuschoff et al., 2011; Clewett et al., 2020)). This view has also been challenged by recent  
66 findings that pupil size changes correlate with activity in other brain structures, and that pupil and  
67 LC respond to task epochs differently and have variable relationships (Joshi et al., 2016; Cazettes

68 et al., 2020; Yang et al., 2021; Megemont et al., 2022). However, it is still unclear whether  
69 physiological diversity of LC neurons contributes to their distinct relationship with pupil diameter.  
70 Elucidating heterogeneity in the pupil-LC relationship will provide mechanistic insights into and  
71 set appropriate constraints on interpreting pupil diameter as a readout of LC activity.

72  
73 To address these questions, we took advantage of recent development in mouse genetics that  
74 allowed identifying NA<sup>+</sup> neurons with a specific marker, i.e., the presence of dopamine-beta-  
75 hydroxylase (DBH, an enzyme in the NA synthesize pathway downstream of tyrosine  
76 hydroxylase), and expressed ChannelRhodopsin-2 (ChR2) in DBH<sup>+</sup> neurons. We recorded  
77 spiking activity from single units in the LC that were responsive to optogenetic stimulation, with a  
78 subset of these units exhibiting a distinctive narrow spike waveform and lacking the prolonged  
79 after-hyperpolarization. A fraction, but not all of the narrow units appeared to be fast spiking. Next,  
80 we provided evidence revealing a link between the proximity of LC neurons and their response  
81 latency, where putatively spatially proximal neurons tended to have a long latency in response to  
82 optogenetic activation. Finally, we found that response latency of LC neurons was correlated with  
83 their burst firing and distinct relationship with pupil diameter. Together, this study presents novel  
84 evidence to advance our understanding of the heterogeneity of LC neurons at the functional level,  
85 and provides further physiological insights into the relationship between pupil and LC.

86

## 87 **Results**

88

89 To collect a dataset that consisted of putatively noradrenergic neurons in the LC, we implemented  
90 an approach to drive a genetically encoded ChannelRhodopsin-2 (ChR2(H134R)) transgene  
91 monoallelically from the *Gt(ROSA)26Sor* locus (*DBH-Cre/+;Ai32/+*). Taking this approach  
92 instead of using a viral vector should allow less variation in copy number and spatial spread when  
93 expressing ChR2 across DBH<sup>+</sup> neurons. We used long pulses (0.2-0.3 s) for optogenetic tagging  
94 as recent work showed that a subset of LC neurons cannot be excited by short pulses (Hickey et  
95 al., 2014; Li et al., 2016). Only neurons that emitted spikes in response to optogenetic stimulation  
96 were included in the dataset (Fig. 1a, b).

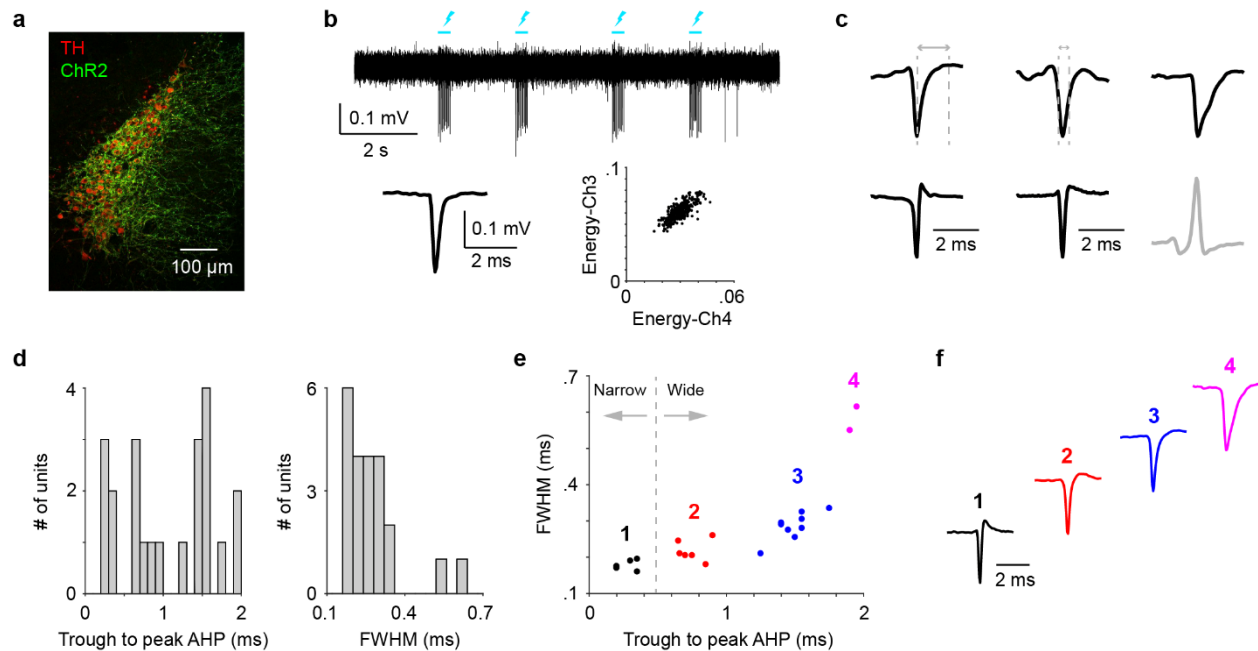

### Figure 1. Quantifying spike waveforms of the units

(a) ChR2 expression in a DBH-Cre/+;Ai32/+ mouse. TH: Tyrosine hydroxylase.

(b) Top: Response of a ChR2-expressing LC neuron to optogenetic stimulation (lightning bolts). Bottom: Spike waveform and spike sorting diagram of this unit.

(c) Example spike waveforms with trough to peak AHP and FWHM indicated. Black: typical extracellular spike waveforms with negative-positive polarity. Gray: Spike waveforms with distorted/reversed polarity. Only units with the typical waveforms were included in d-f.

(d) Histogram of trough to peak AHP (Left) and FWHM (Right) of LC units (n = 22).

(e) Scatter plot of trough to peak AHP vs. FWHM, based on which K-means clustering classified 4 classes of spike waveforms (color coded).

(f) Average spike waveform of each class in (e).

97

98 We first reported spike waveform properties of these neurons (35 units from 26 recordings of 21  
99 mice). We strove to ensure that all units were distinct from one another by taking a conservative  
100 approach to include one recording from each mouse, with one exception: when a second  
101 recording from the same animal was acquired on a separate day, and a light-responsive unit was  
102 present in a tetrode channel different from the first recording, the unit from the second recording  
103 was considered distinct from the first recording and included (5 units from the second recordings  
104 of 5 mice. Waveform similarity between units from the second recording and units from the first  
105 recording of the same mouse:  $0.35 \pm 0.23$ , mean  $\pm$  SEM, Methods). Typically, we were able to

106 sort one single unit from a recording (18/26 (69%) recordings yielded 18 units), but a subset of  
107 recordings yielded multiple tagged units (8/26 (31%) recordings yielded 17 units). We observed  
108 a spectrum of spike waveforms from this dataset, the majority of which had the typical polarity of  
109 extracellularly recorded waveform (negative-positive polarity, 22/35. Fig.1c black). A minority  
110 exhibited distorted/reversed polarity (13/35. Fig. 1c gray), indicating that the recording site was in  
111 the distal axonal or dendritic compartment of a neuron where estimating waveform properties  
112 would be less accurate (Rall and Shepherd, 1968; Gold et al., 2006; Barry, 2015; Sun et al., 2021).  
113

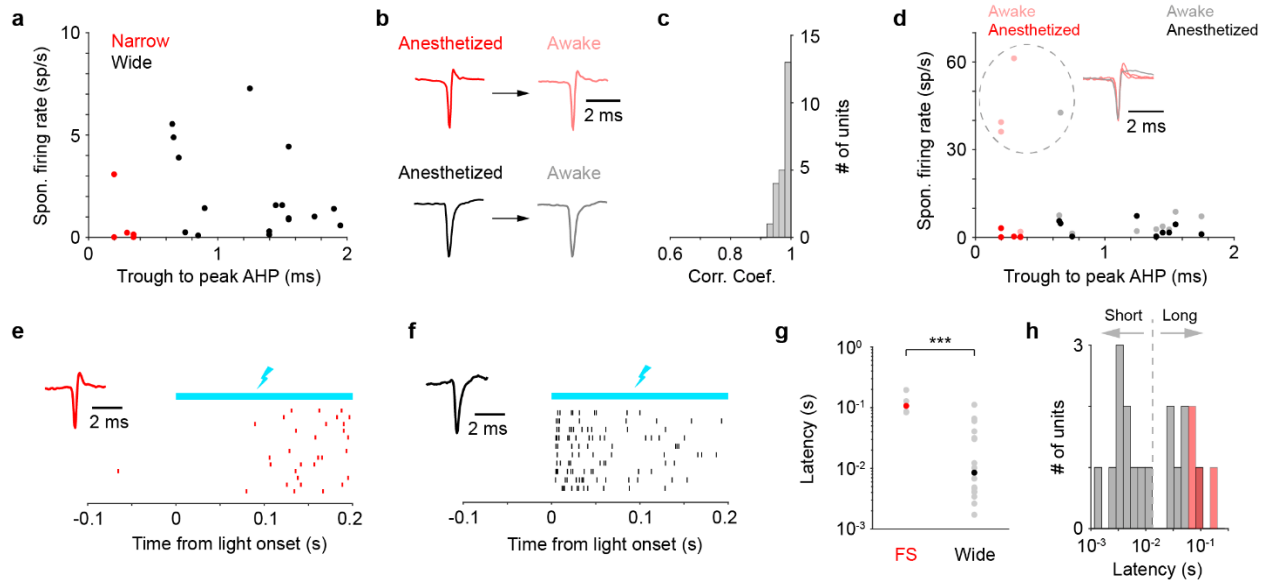

## Figure 2. A subset of the units exhibited fast-spiking feature

(a) Scatter plot of spontaneous firing rate vs. trough to peak AHP for narrow (n = 5) and wide (n = 17) units under anesthesia.

(b) Example waveforms of the putative same units recorded in anesthetized (dark color) and awake state (light color).

(c) Histogram of spike waveform similarity (Pearson correlation coefficient) of the putative same units recorded in both states.

(d) Scatter plot of spontaneous firing rate vs. trough to peak AHP in anesthetized (dark color) and awake state (light color). A subset of units shown in (a) underwent both states (5 narrow and 9 wide units). 3 narrow units and 1 wide unit (circled) exhibited spontaneous firing rate > 30 spikes/s in the awake state, and were considered as fast-spiking. The waveforms of these units are shown next to the dashed circle.

(e) Example spike trains (ticks) to optogenetic stimulation of an FS unit, with 127 ms response latency to stimulation. Rows represent trials.

(f) Example spike trains (ticks) to optogenetic stimulation of a wide unit, with 5 ms response latency to stimulation. Rows represent trials.

(g) Comparison of response latency between FS ( $n = 4$ ) and wide units ( $n = 16$ ) during anesthesia with median indicated. FS vs. Wide, 106 (85, 160) ms vs. 8 (4, 36) ms, median (IQR),  $P = 1e-4$ .

(h) Histogram of response latency for FS and wide units shown in (g).

114

115 Therefore, reversed polarity units were excluded from the following analyses concerning spike  
116 width. We quantified the width of the typical spike waveforms based on trough to peak after-  
117 hyperpolarization (AHP) and full width at half maximum (FWHM, Fig. 1c). Trough to peak AHP  
118 was relatively widely distributed between 0.2 and 2 ms, while FWHM was more narrowly  
119 distributed and peaked around 0.2-0.3 ms (Fig. 1d). These results suggest that spike waveforms  
120 could be more separable using trough to peak AHP. Accordingly, we classified narrow and wide  
121 units based on a threshold between 0.4 and 0.6 ms trough to peak AHP (Totah et al., 2018),  
122 yielding 23% (5/22) narrow and 77% (17/22) wide units. The units appeared to form additional  
123 subclusters (Fig. 1e), which were further classified by K-means clustering (Methods),  
124 demonstrating that narrow units exclusively exhibited one waveform subclass which lacked the  
125 prolonged AHP, while wide units likely possessed different waveform subclasses (Fig. 1e, f).

126

127 The presence of narrow units in/around the mouse LC supports a recent rat study, where ~15%  
128 of the population (34/234) was found to be narrow (Totah et al., 2018). However, could the narrow  
129 units be fast-spiking interneurons (Breton-Provencher and Sur, 2019)? Under isoflurane  
130 anesthesia (2%), all units showed low spontaneous firing rate (0.6 (0.2, 1.7) spikes/s, median  
131 (IQR), Fig. 2a). A subset of the recordings was acquired in the awake state as well (<4 hours  
132 interval between anesthetized and awake states). In order to examine their awake firing rate, we  
133 first strove to ensure that the putatively same units were tracked in the two states by including the  
134 units that were acquired from the same tetrode channel in both states with highly similar  
135 waveforms (Fig. 2b, c. 5 narrow units, 9 wide units and 9 reversed polarity units. Waveform  
136 similarity, anesthesia vs. awake: 0.98 (0.96, 0.99),  $n = 23$ ). In the awake state, we found that a  
137 fraction of these units exhibited >30 Hz spontaneous firing rate (Fig. 2d, circled ones). Together  
138 with their apparent narrow spike waveforms, these units were likely to be fast-spiking (FS)  
139 interneurons. Interestingly, all putative FS units had >80 ms response latency to tagging, longer  
140 than the classic wide units (FS vs. Wide, 106 (84, 160) vs. 8 (4, 36) ms,  $P = 1.0e-4$ , Fig. 2e-h),  
141 and longer than all non-FS units as well (FS vs. All, 106 (85, 160) ms vs. 12 (5, 38) ms,  $P =$   
142 0.0041). Our results suggest that a fraction of the narrow units in/around the LC are fast-spiking

143 interneurons. As a result, these FS units were excluded from further analysis, and the remaining  
 144 units were considered as LC NA+ neurons.  
 145

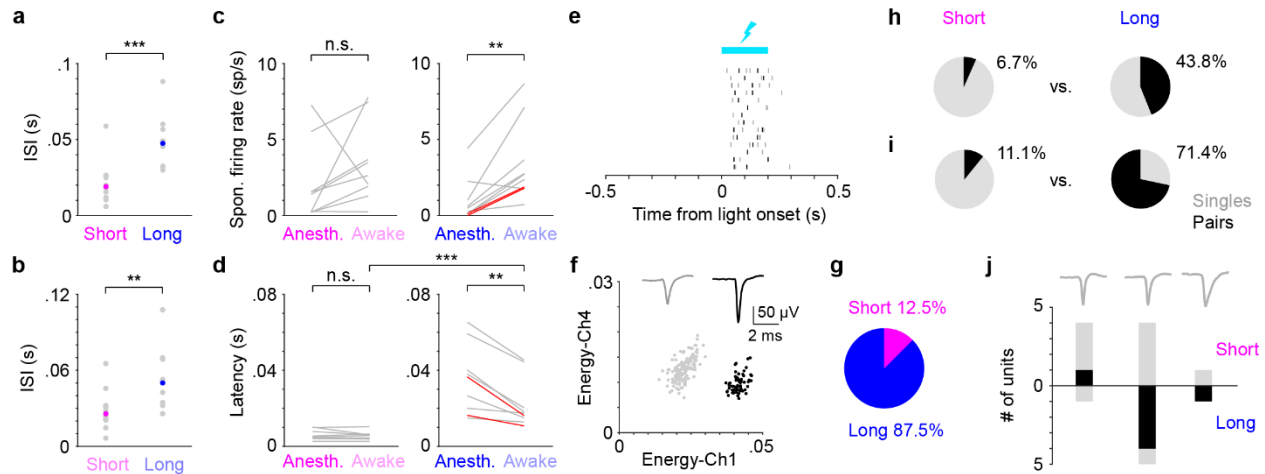

### Figure 3. Different response properties of the units

(a) Comparison of ISI during anesthesia tagging between short and long latency units with median indicated. Short vs. Long, 19 (12, 21) ms vs. 47 (32, 57) ms,  $P = 9.7e-4$ . A total of 19 units underwent tagging in both anesthetized and awake states. Units with response latency  $< 12$  ms were considered short latency ( $n = 10$ , magenta),  $> 12$  ms considered long latency ( $n = 9$ , blue). Main results in Fig. 3 held when using 10 ms to classify latency. It is important to point out that in 2 recordings the evoked ISI is  $\leq 10$  ms. This does not translate to a sustained firing rate  $> 100$  spikes/s. Instead, it represents a short burst of spiking (typically 2 spikes) evoked by light.

(b) Comparison of ISI during awake tagging between short and long latency units with median indicated. Short vs. Long, 25 (21, 32) ms vs. 50 (34, 69) ms,  $P = 0.0082$ . Short and long latency units were classified in the anesthetized state.

(c) Comparisons of spontaneous firing rate between anesthetized and awake state for short and long latency units. Left: short latency units, 1.7 (0.2, 2.5) vs. 2.8 (2.0, 4.1) spikes/s,  $P = 0.13$ ,  $n = 10$ ; Right: long latency units, 0.4 (0.1, 0.8) vs. 2.8 (2.1, 4.6) spikes/s,  $P = 0.0039$ ,  $n = 9$ . Two red lines indicate the two non-FS narrow units.

(d) Comparisons of response latency to tagging between anesthetized and awake state for short and long latency units. Left: short-latency units, 5 (4, 8) vs. 6 (4, 7) ms,  $P = 0.38$ ,  $n = 10$ ; Right: long-latency units, 36 (19, 45) vs. 17 (14, 26) ms,  $P = 0.0039$ ,  $n = 9$ . Two red lines indicate the two non-FS narrow units. One long-latency narrow unit became short-latency under awake state.

(e) Example spike trains (ticks) to optogenetic stimulation of two distinct single units (grey and black) recorded from the same tetrode channel. We call these units 'pairs'.

(f) Spike sorting diagram and waveforms of the two units in (e). Units were identified in Ch1.

(g) Pie chart showing the percentage of short and long latency units in all unit pairs. Short vs. Long, 12.5% (1/8) vs. 87.5% (7/8),  $P = 0.0027$ , chi-squared test.

(h) Pie chart showing the percentage of unit pairs (black) in short and long latency unit groups during anesthesia. Short vs. Long, 6.7% (1/15) vs. 43.8% (7/16),  $P = 0.018$ , chi-squared test.

(i) Pie chart showing the percentage of unit pairs (black) in short and long latency wide unit groups during anesthesia. Short vs. Long, 11.1% (1/9) vs. 71.4% (5/7),  $P = 0.013$ , chi-squared test.

(j) Bar plot showing the number of singles (grey) and pairs (black) in the three subgroups of wide units (classified in Fig. 1e, f), separated by short and long latency. Same data as in (i). 2 unit pairs were of reserved polarity and not shown here.

146

147 LC neurons showed different response latencies to tagging (Fig. 2h). Since the latency distribution  
148 appeared to be bimodal separated around 10-12 ms, we considered  $< 12$  ms as short latency,  
149 and  $> 12$  ms as long latency (only two reversed polarity units had latency of 11 ms and would be  
150 classified differently). The identification of long latency units supports recent findings both *in vitro*  
151 and *in vivo* (Hickey et al., 2014; Li et al., 2016), suggesting heterogeneous excitability across LC  
152 neurons. Other lines of evidence further supported the possibility that the long latency units had  
153 lower excitability including: 1) the long latency units had longer ISI than the short latency units  
154 during tagging (Fig. 3a, b); and 2) transitioning from anesthetized to awake state only long latency  
155 units showed a significant increase of spontaneous firing rate, accompanied by a reduction of  
156 response latency (Fig. 3c, d). However, only one long latency unit (narrow) was turned to short  
157 latency in the awake state, and the latency difference between the two groups persisted (Short  
158 vs. Long in the awake state,  $P = 2.2e-5$ , with short and long latency defined in the anesthetized  
159 state, Fig. 3d), suggesting that behavioral states (anesthesia vs. awake) alone are insufficient to  
160 account for the differences in response latency.

161

162 As described previously, typically one tagged unit can be sorted from a recording, but a subset of  
163 recordings yielded multiple tagged units. Specifically, in a set of recordings two light-responsive  
164 single units were present in the same tetrode channel (Fig. 3e, f. We have never sorted more than  
165 two tagged units from one channel). A total of 8 such units were acquired from 4 recordings (6  
166 wide units and 2 reversed polarity units), and we called them 'pairs'. Subsequently, the other units  
167 were called 'singles'. The fact that a single tetrode channel was able to pick up the spiking activity



168 of two distinct units suggests that the two units were spatially proximal to each other. Interestingly,  
 169 among these 8 unit pairs, only 1 had a short response latency, and all the remaining units had  
 170 long latencies (12.5% (1/8) vs. 87.5% (7/8),  $P = 0.0027$ , chi-squared test, Fig. 3g). We also found  
 171 higher proportion of unit pairs in the long latency group compared with that in the short latency  
 172 group when we included all units that were tested under anesthesia (6.7% (1/15) vs. 43.8% (7/16),  
 173  $P = 0.018$ , Fig. 3h), or all wide units tested under anesthesia (11.1% (1/9) vs. 71.4% (5/7),  $P =$   
 174 0.013, Fig. 3i, j). Together, our data suggest a link between proximity and response latency, such  
 175 that putatively proximal LC neurons tended to have a long response latency to optogenetic  
 176 activation.  
 177

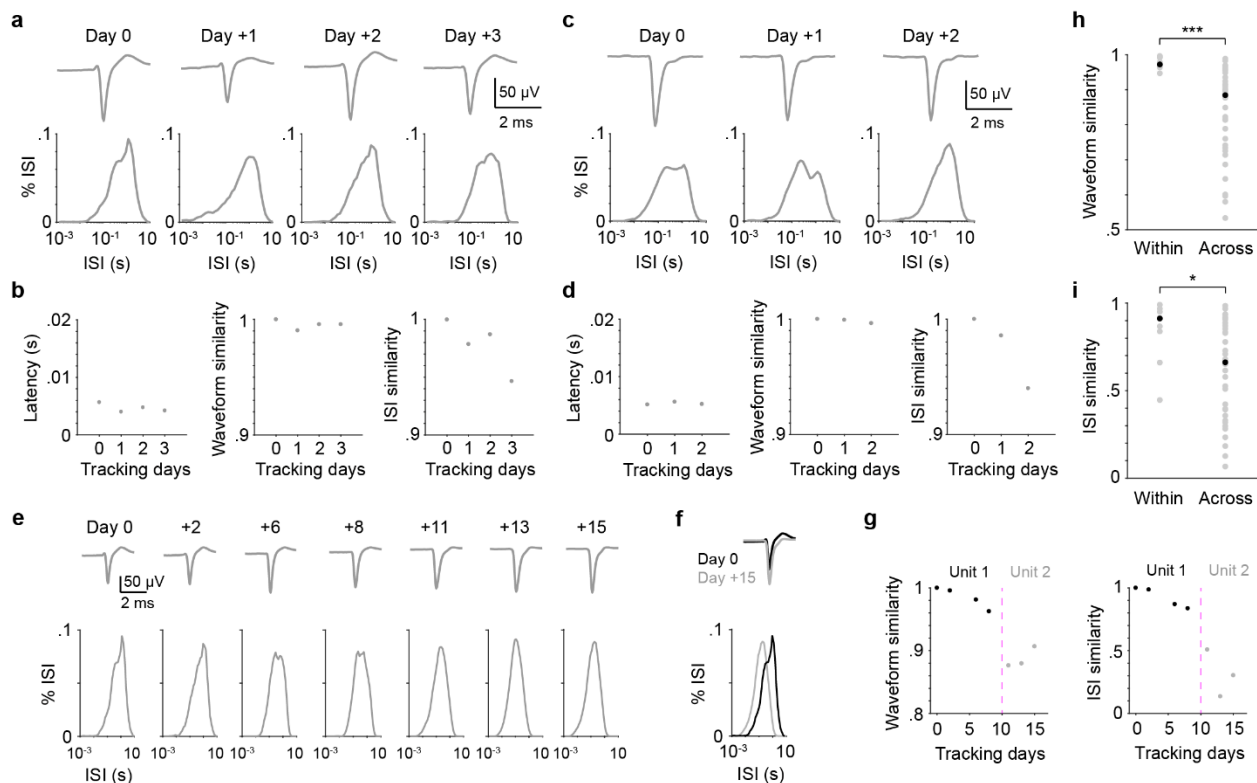

**Figure 4. Tracking units across sessions**

(a) Example spike waveforms and ISI distributions acquired from the same tetrode channel for 4 consecutive days during behavior.

(b) Response latency to tagging, spike waveform and ISI distribution similarities across the 4 days shown in (a). Similarity was quantified as the Pearson correlation coefficient between day 0 and each following day.

(c, d) Same conventions as in (a, b), but for recordings from a different mouse for 3 consecutive days.

- (e) Same convention as in (a), but for recordings across 16 days.
- (f) Overlay of spike waveforms and ISI distributions on the first day (day 0) and last day (day +15) shown in (e). Note that the AHP was prominent on day 0 but was much reduced on day +15.
- (g) Same conventions as in (b) for the recordings in (e). Note the sharp decreases in both spike waveform and ISI similarities between day 8 and day 10 (magenta line), indicative of the transition from one unit to another.
- (h) We used a spike waveform similarity threshold 0.95 to distinguish the putatively same units from the putatively distinct units, and obtained 9 putatively distinct units, each tracked for at least 2 sessions. Among these 9 units, spike waveforms from the putatively same units on the first day and last day (Within) were more similar than spike waveforms from the putatively different units on the first day (Across. Within vs. Across, Pearson correlation coefficient, 0.97 (0.97, 0.99) vs. 0.88 (0.73, 0.94),  $P = 6.7e-5$ ). Gray dots: individual pairs. Black dots: group median.
- (i) Same conventions as in (h), but for comparing ISI distribution within and across the 9 units. Within vs. Across, 0.91 (0.79, 0.95) vs. 0.66 (0.34, 0.88),  $P = 0.018$ .

178

179 Pupil diameter has been often treated as a noninvasive readout of LC activity (e.g., (Aston-Jones  
180 and Cohen, 2005; Gilzenrat et al., 2010; Preuschoff et al., 2011; Clewett et al., 2020)), but recent  
181 work challenged this view (Joshi et al., 2016; Yang et al., 2021; Megemont et al., 2022). We  
182 wondered whether physiological differences of LC neurons underlie their distinct relationship with  
183 pupil diameter. We further wondered whether the same neuron may correlate with pupil differently,  
184 i.e., exhibit session-to-session variability. If true, this would uncover another layer of variability  
185 and complexity when treating pupil diameter as a readout of LC activity. In this set of experiments,  
186 we recorded from single LC units with simultaneous pupil tracking in mice performing a tactile  
187 detection task (Methods). We acquired one session per day from each mouse for as long as a  
188 tagged unit was present. Therefore, testing these hypotheses requires to first distinguish the  
189 recordings of the putatively distinct LC units from the putatively identical units and then to examine  
190 their relationship with pupil diameter, respectively. To quantitatively assess whether the putatively  
191 same unit was tracked, we restricted analysis to a set of recordings with the following criterion:  
192 recordings across multiple days from the same mouse were included when in each recording the  
193 same tetrode channel contained a tagged unit. Across these multiple recordings from the same  
194 mouse, we compared spike waveform and ISI distribution on day 0 (first recording session)  
195 against spike waveform and ISI distribution on each following session/day (Methods). Both  
196 similarity measures stayed high across sessions, but ISI similarity appeared to have slightly bigger  
197 fluctuations (Fig. 4a-d). In few cases we observed more dramatic changes in both similarity

198 measures, suggesting a shift from recording one unit to another (Fig. 4e-g). Based on these  
 199 observations and a recent tracking study in the olfactory cortex (Schoonover et al., 2021), we  
 200 established a spike waveform similarity threshold of 0.95 to distinguish the putatively same units  
 201 from different units. Based on this metric, 9 putatively different units from 6 mice were tracked for  
 202 at least 2 sessions during behavior. This represents a low probability (<30%, 6 out of 21 mice) of  
 203 tracking LC neurons across days, demonstrating the challenges of this approach (Eschenko and  
 204 Sara, 2008). Spike waveform similarity from the putatively same unit across days (Within: day 0  
 205 vs. last day) was higher than the waveform similarity between the putatively different units (Across:  
 206 day 0, unit 1 vs. unit 2. Within vs. Across, 0.97 (0.97, 0.99) vs. 0.88 (0.73, 0.94), median (IQR), P  
 207 = 6.7e-5, Fig. 4h). In parallel, this metric was able to distinguish ISI similarity quantified within the  
 208 same unit from ISI similarity quantified across different units (Within vs. Across, 0.91 (0.79, 0.95)  
 209 vs. 0.66 (0.34, 0.88), P = 0.018, Fig. 4i).  
 210

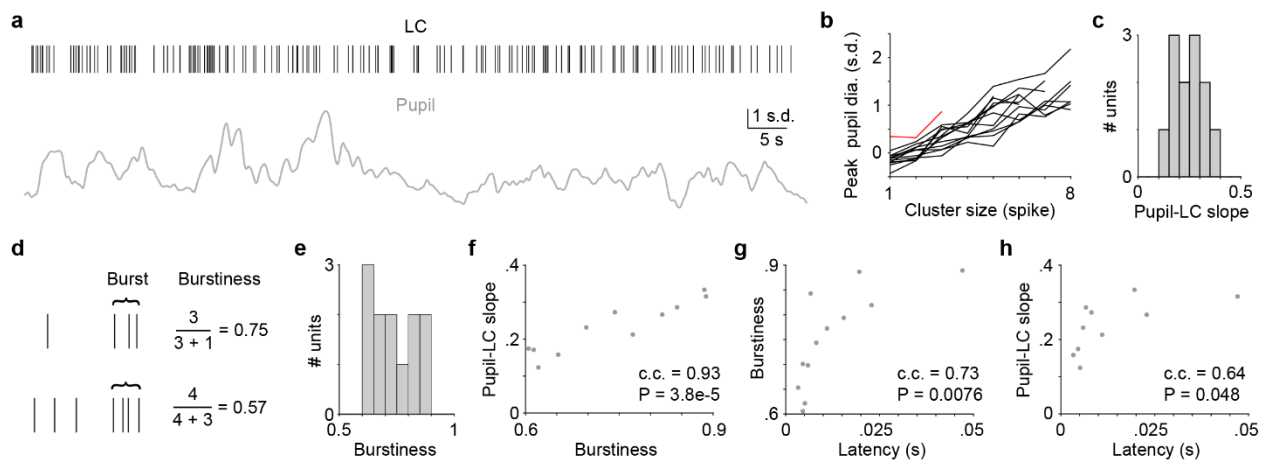

### Figure 5. Pupil-LC relationship across distinct LC neurons

- (a) Example simultaneously recorded LC spike train (ticks) and pupil diameter (z-scored).  
 (b) The relationship between peak pupil diameter and LC cluster size for all 13 distinct units. Relationships with linear regression  $R^2 > 0.6$  in black ( $n = 12$ ),  $< 0.6$  in red ( $n = 1$ ).  
 (c) Histogram of the pupil-LC slopes with  $R^2 > 0.6$  in (b).  
 (d) Demonstration of the definition of burstiness.  
 (e) Histogram of burstiness for the 13 units in (b).  
 (f) The relationship between pupil-LC slopes and burstiness for the units with  $R^2 > 0.6$  in (b).  
 c.c.: Pearson correlation coefficient.  
 (g) The relationship between burstiness and response latency to tagging.  
 (h) The relationship between pupil-LC slopes and response latency to tagging.

212 With the ability to distinguish the recordings of the putatively distinct units from the putatively same  
213 units, we can now assess 1) whether LC physiological differences contribute to the variations in  
214 the pupil-LC relationship for distinct neurons, and 2) whether pupil-LC relationship exhibits  
215 session-to-session variations for the same neuron. To address the first question, we analyzed the  
216 relationship between pupil diameter and the putatively distinct LC units, using methods described  
217 in our recent study (Megemont et al., 2022). Briefly, we first grouped adjacent spikes into  
218 individual clusters based on each unit's ISI distribution and associated cluster size (number of  
219 spikes) to the amplitude of pupil dilation. Using a dataset that was largely different from our  
220 previous work (Methods), we recapitulated similar variations in the pupil-LC relationship (Fig. 5a-  
221 c). How we computed LC cluster reminded the definition of burst firing in the literature (Fig. 5d,  
222 e, Methods, (Guido et al., 1992; Senzai et al., 2019)). However, these two measures can be  
223 dissociated from each other (see Discussion). With the attempt to further decorrelate the two  
224 measures, we used a fixed threshold of 0.1 s to define burst firing (burstiness). Consistent with  
225 the idea that pupil dilation better tracks phasic activity of LC neurons (e.g., (Aston-Jones and  
226 Cohen, 2005; Murphy et al., 2014; Reimer et al., 2016)), it is perhaps intuitive that the differences  
227 in burstiness of LC neurons correlated with the variations in the pupil-LC relationship, where more  
228 bursting neurons exhibited a stronger relationship with pupil dilation (Fig. 5f). Importantly,  
229 independent from clustering spikes, we found that response latency to tagging was positively  
230 correlated with both the degree of burstiness of LC neurons and their relationship with pupil  
231 diameter (Fig. 5g, h). Similar results held when we used a different method to define burstiness,  
232 or used other thresholds to quantify burst firing and pupil-LC relationship (Methods). Together,  
233 our data show that variations in response latency of LC neurons to optogenetic tagging was linked  
234 to their burst firing and distinct relationship with pupil diameter.

235  
236 Next, we tested whether the pupil-LC relationship was variable for the same LC neuron across  
237 sessions. Examples from two distinct units showed noticeable session-to-session differences in  
238 their relationship with pupil, such that on different sessions identical amplitude of pupil dilation  
239 was linked to different LC activity (Fig. 6a, b). Overall, we were able to obtain the tracking of 4  
240 distinct LC units across at least 3 sessions where monotonic pupil-LC relationships can be  
241 established (Methods). We compared the variation of pupil-LC slopes from each unit across  
242 sessions against the variation of pupil-LC slopes across distinct units (population). By resampling  
243 the population slopes to generate a reference distribution, we found that the variation of pupil-LC  
244 slopes within each individual unit was largely comparable to the population variation (Fig. 6c, d,  
245 Methods). Burstiness across sessions cannot account for the variation in the pupil-LC slopes

246 within individual units, while behavioral states (hit rate, false alarm rate) correlated with the pupil-  
 247 LC slopes in 2 out of the 4 units (Fig. 6e-g). These results demonstrate that session-to-session  
 248 fluctuations of the pupil-LC relationship for the putatively same unit are as variable as the neuron-  
 249 to-neuron fluctuations of this relationship. Together, our results uncovered a physiological  
 250 correlate of the pupil-LC relationship, and revealed two levels of variability in this relationship, i.e.,  
 251 across different neurons and within the same neuron.  
 252

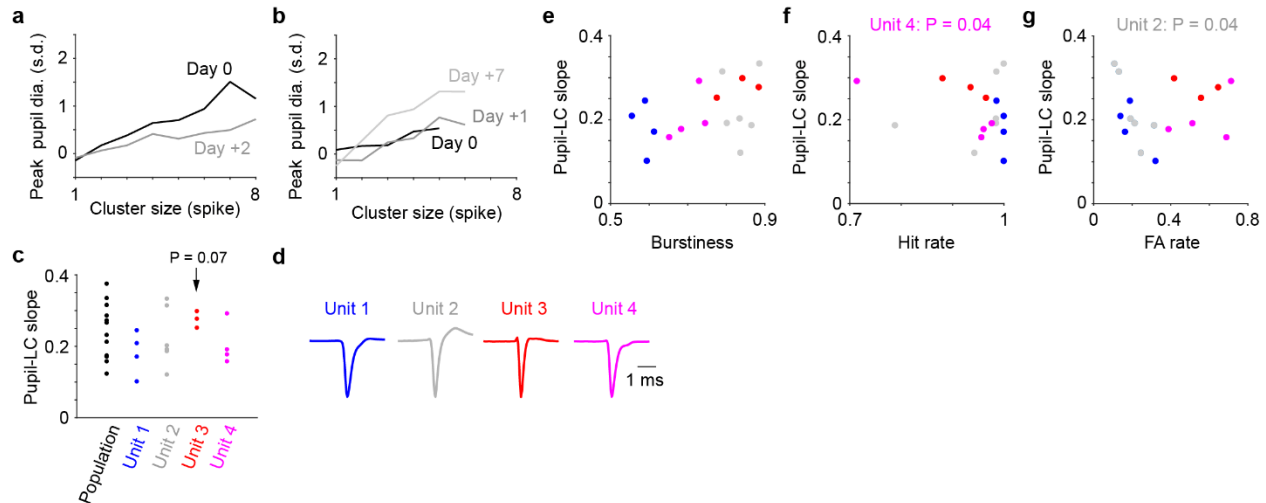

**Figure 6. Pupil-LC relationship within the same LC neurons**

(a-b) Example pupil-LC relationships for two distinct units tracked across days. (a): Pupil-LC slope on day 0: 0.21; day +2: 0.10. (b): Pupil-LC slope on day 0: 0.12; day +1: 0.19; day +7: 0.31.

(c) The variation of pupil-LC slopes within each individual unit was largely comparable to the variation of pupil-LC slopes across distinct units (population. Unit 1 vs. Population,  $P = 0.37$ ; Unit 2 vs. Population,  $P = 0.29$ ; Unit 3 vs. Population,  $P = 0.07$ ; Unit 4 vs. Population,  $P = 0.32$ ).

(d) Average waveforms of the 4 tracked units in (c).

(e) Scatter plot of pupil-LC slope vs. burstiness across sessions for individual units (same color code as in c, d). Unit 1: c.c. = -0.35,  $P = 0.65$ ; Unit 2: c.c. = 0.08,  $P = 0.88$ ; Unit 3: c.c. = 0.65,  $P = 0.56$ ; Unit 4: c.c. = 0.61,  $P = 0.39$ .

(f) Scatter plot of pupil-LC slope vs. Hit rate across sessions for individual units. Unit 1: c.c. = -0.69,  $P = 0.31$ ; Unit 2: c.c. = 0.41,  $P = 0.42$ ; Unit 3: c.c. = -0.97,  $P = 0.14$ ; Unit 4: c.c. = -0.95,  $P = 0.04$ .

(g) Scatter plot of pupil-LC slope vs. False alarm rate across sessions for individual units. Unit 1: c.c. = -0.78,  $P = 0.29$ ; Unit 2: c.c. = -0.82,  $P = 0.04$ ; Unit 3: c.c. = -0.57,  $P = 0.63$ ; Unit 4: c.c. = 0.46,  $P = 0.54$ . c.c., Pearson correlation coefficient.

## 254 Discussion

255

256 We provide a unique dataset to explore heterogeneity in the mouse LC. Our sample size may  
257 appear small compared to other studies that recorded from non-opto-tagged units. However, to  
258 our knowledge, the current study presents one of the largest *in vivo* datasets of opto-tagged units  
259 in the LC to study its physiological and functional heterogeneity.

260

261 Our data showed that a fraction, but not all of the narrow units in the LC were fast spiking. A  
262 recent study reported the existence of ~15% narrow units in rats (Totah et al., 2018), where LC  
263 neurons were identified under anesthesia by 'pharmacological tagging', i.e., their spiking activity  
264 can be silenced by  $\alpha 2$  receptor agonist. However, a mouse study implied that the narrow units  
265 could be GABAergic interneurons (Breton-Provencher and Sur, 2019). Based on our data, it is  
266 possible that the non-FS narrow units are NA+ (~10%, 2/18). At the same time, our data suggest  
267 that a sizable proportion of the narrow units identified under anesthesia are fast-spiking  
268 interneurons, as anesthesia could inhibit and suppress their fast-spiking feature (Patel et al., 1999;  
269 Zhao et al., 2021).

270

271 Intracellular studies have reported AHP amplitude differences on the order of several millivolts  
272 among different LC populations (e.g., (Chandler et al., 2014; Wagner-Altendorf et al., 2019)). This  
273 may account for the different spike waveforms within the wide units, but it is unlikely to explain  
274 the absence of the extracellularly measured slow AHP component in the narrow units. We  
275 speculate that the narrow units may have lower expression of the small-conductance,  $\text{Ca}^{2+}$ -  
276 activated  $\text{K}^+$  (SK) channels, which are known to mediate the prolonged AHP in neurons including  
277 the LC (Louise Faber and Sah, 2003; Adelman et al., 2012; Matschke et al., 2018). We did not  
278 have access to identifying the location of the recorded units, but in rats narrow units were found  
279 to be distributed toward the ventral LC (Totah et al., 2018), which may preferentially innervate the  
280 spinal cord (Li et al., 2016; Hirschberg et al., 2017).

281

282 We found a considerable proportion of putative LC NA+ neurons with long response latency to  
283 optogenetic activation despite of anesthetized or awake state (~40%, 8/19). We drove the  
284 expression of ChR2 monoallelically by crossing two mouse lines (*DBH-Cre;Ai32*). Thus, response  
285 latency differences should not be due to variations in ChR2 expression across DBH+ neurons.  
286 Although we cannot rule out the possibility that long response latency on the order of several tens  
287 of milliseconds could be a result of indirect activation (McCall et al., 2015), it has been reported

288 that a sizable fraction (~30%, 2/6) of ChR2-expressing LC NA<sup>+</sup> neurons *in vitro* can only be  
289 activated to emit spikes with prolonged illumination (> 100 ms, (Hickey et al., 2014)). An *in vivo*  
290 study also identified a fraction (~40%) of LC neurons that can only be excited by long pulses (4/9  
291 neurons required >200 ms pulses, (Li et al., 2016)). These lines of evidence lead to the possibility  
292 of heterogeneous excitability among LC neurons. Since NA inhibits LC activity (Cedarbaum and  
293 Aghajanian, 1976; Aghajanian et al., 1977; Egan et al., 1983; Foote et al., 1983), it is plausible  
294 that the long latency units are inhibited by nearby opto-activated LC neurons. Specifically, a recent  
295 modeling study predicts that spatially adjacent LC neurons can mutually inhibit each other via NA  
296 acting on  $\alpha_2$  receptors (Baral et al., 2022). We noticed that if two LC units were recorded by one  
297 tetrode channel (unit pairs), these units were more likely to have a long response latency. Our  
298 tetrode wires have nominal impedance of 200-500k $\Omega$ , thus should be sensitive to spiking signal  
299 within ~100  $\mu\text{m}$  radius (c.f. (Barthó et al., 2004; Jun et al., 2017)). The discovery of long latency  
300 unit pairs supports this prediction (Baral et al., 2022), suggesting that long response latency to  
301 optogenetic activation reflects enhanced mutual inhibition and reduced excitability in a set of LC  
302 neurons. If true, the activity of these neurons would be more likely to be anticorrelated. However,  
303 our data are insufficient to test such hypothesis (3 out of 8 unit pairs were confirmed to underwent  
304 tagging in the awake state, and none was recorded during behavior). Future studies (both *in vitro*  
305 and *in vivo*) are needed to test these conjectures.

306  
307 Although both LC cluster and burstiness were defined in similar ways, burstiness took longer  
308 baseline activity into account for normalization. As a result, a given cluster size could correspond  
309 to different levels of burstiness. On the other hand, response latency to tagging was completely  
310 independent from the methodology of clustering LC spikes but was found to be correlated with  
311 burstiness and pupil-LC relationship. Therefore, our results suggest that the excitability of LC  
312 neurons underlies their firing patterns and the relationship with pupil diameter.

313  
314 We revealed two levels of variability in the pupil-LC relationship, i.e., across different neurons and  
315 within the same neuron, substantiating and extending previous conclusions that pupil diameter is  
316 not an accurate readout of LC activity. What underlies the session-to-session fluctuations of the  
317 pupil-LC relationship within individual LC neurons? Technical limitations in the current study may  
318 have restricted the statistical power to fully address this important question, as it is rare that the  
319 putatively same neuron can be recorded over multiple days for reliably assessing its relationship  
320 with pupil. However, based on the literature, we speculate that the pupil-LC relationship is  
321 modulated by various external and internal factors, including LC physiological heterogeneity,

322 behavioral states and input from other brain regions (Joshi et al., 2016; Cazettes et al., 2020;  
323 Megemont et al., 2022). Importantly, these factors may not be completely independent from one  
324 another, e.g., behavioral states may influence burst firing, and different behavioral states could  
325 engage different neural circuits.

326

### 327 **Author contributions**

328 LST, JML and HY planned the project. LST and JML performed experiments. LST, JML and HY  
329 analyzed data with assistance from MG, MM and MR. MM, MG and HY wrote the manuscript with  
330 contributions from all authors. HY supervised research.

331

### 332 **Acknowledgements**

333 We thank Viji Santhakumar, Deepak Subramanian, Edward Zagher and Sachiko Haga-Yamanaka  
334 for comments on the manuscript. MR was supported by NIH grants (R01NS104026,  
335 R21MH118640). HY was supported by UCR startup, Klingenstein-Simons Fellowship Awards in  
336 Neuroscience, and NIH grants (R01NS107355, R01NS112200).

337

338 **Data availability.** Data are available from the corresponding author upon request.

339

340 **Code availability.** MATLAB scripts used to analyze the data are available from the  
341 corresponding author upon request.

342

343 **Competing interest.** The authors declare no potential conflict of interest.

344

345

346

347

348

349

350

351

352

353

354

355



## 356 **Materials and Methods**

357

358 All procedures were performed in accordance with protocols approved by UC Riverside Animal  
359 Care and Use Committee (AUP 20190031). Mice were DBH-Cre (B6.FVB(Cg)-Tg(Dbh-cre)  
360 KH212Gsat/Mmucd, 036778-UCD, MMRRC); Ai32 (RCL-ChR2(H134R)/EYFP, 024109, JAX),  
361 singly housed in a vivarium with reverse light-dark cycle (9a-9p). Male and female mice of 8-12  
362 weeks were implanted with titanium head posts as described previously (Yang et al., 2016).  
363 Procedures for microdrive construction and LC recording have been described previously (Yang  
364 et al., 2021; Megemont et al., 2022). Briefly, custom microdrives with eight tetrodes and an optic  
365 fiber (0.39 NA, 200  $\mu$ m core) were built and implanted in the left LC to make extracellular  
366 recordings. At the conclusion of the experiments, brains were perfused with PBS followed by 4%  
367 PFA, post-fixed overnight, then cut into 100  $\mu$ m coronal sections and stained with anti-Tyrosine  
368 Hydroxylase (TH) antibody (Thermo-Fisher OPA1-04050).

369

370 Behavior task was controlled by BControl (C. Brody, Princeton University) or custom-based  
371 Arduino hardware and software as described previously (Yang et al., 2016, 2021; McBurney-Lin  
372 et al., 2020). Video of the left pupil (ipsilateral to LC recording and stimulation) was acquired at  
373 50 Hz using a PhotonFocus camera and StreamPix 5 software, or at 20 Hz using a Basler  
374 acA1300-200um camera and Pylon software. 450 nm blue diode lasers (UltraLasers, MDL-III-  
375 450-200mW) controlled by WaveSurfer (<https://www.janelia.org/open-science/wavesurfer>) were  
376 used for optogenetic stimulation. Pupil diameter was extracted using DeepLabCut (Mathis et al.,  
377 2018). Electrophysiology and pupil tracking were synchronized via a common TTL pulse train.  
378 The mating sleeve connecting two ferrules was covered with black tape to prevent light leak. An  
379 ambient blue LED was used to constrict the pupil and to mask any potential light leak. Optogenetic  
380 stimulation for tagging consisted of a train of 200 or 300-ms pulses delivered at 0.3-0.5 Hz and  
381 10 mW (RMS, measured at the tip of optical fiber). Tagging was performed during anesthesia (2%  
382 isoflurane) and sometimes during awake, non-task performing condition. Mice were trained to  
383 perform a go/no-go single-whisker detection task as described previously (McBurney-Lin et al.,  
384 2020; Yang et al., 2021) or a variant of this task. Briefly, in the original task, licking to the deflection  
385 of the right C2 whisker (go trials) resulted in a water reward (Hit). Licking in the absence of whisker  
386 deflection (no-go trials) resulted in a timeout (False alarm). The main difference in the variant task  
387 is that on no-go trials, the contralateral whisker (left C2) was deflected, instead of no whisker  
388 deflection (similar to (Aruljothi et al., 2020)). All trial type classifications followed the original task.

389

390 Spike sorting was performed using MClust (Redish, 2014). 35 distinct single units (clustering  
391 quality measure,  $L_{ratio}$ :  $0.005 \pm 0.002$ ) from 26 recordings of 21 mice were included. 13 units with  
392 reversed polarity were excluded from the analyses concerning spike width. K-means clustering  
393 used trough to peak AHP and FWHM to classify waveforms in Fig. 1e, f. Spike waveform similarity  
394 was defined as the Pearson correlation coefficient between two waveforms ( $\pm 2$  ms from trough).  
395 ISI distribution was generated by logarithmic binning between 0.001 and 10 s. ISI distribution  
396 similarity was defined as the Pearson correlation coefficient between two distributions.  
397 Spontaneous firing rate in Fig. 2 and 3 were extracted from the tagging sessions as well,  
398 quantified as the average firing rate in a 1-s window before the onset of each stimulation pulse.  
399 For Fig. 4, 9 putatively different units from 6 mice were tracked for at least 2 sessions during  
400 behavior. Results in Fig. 4i held when using a spike waveform similarity threshold between 0.93  
401 and 0.96 to distinguish the putatively same units from different units. For Fig. 5b, 13 distinct units  
402 from 13 recordings of 9 mice were included. 5 recordings were with the original task (Megemont  
403 et al., 2022) and 8 recordings were with the variant task. To quantify the pupil-LC relationship,  
404 adjacent LC spikes were grouped into individual clusters based on each unit's median inter-spike  
405 interval (Megemont et al., 2022). Pupil response associated with each spike cluster was quantified  
406 as the maximum pupil diameter in a 6-s window following the onset of the cluster (time of the first  
407 spike). 12 recordings were with linear regression of pupil-LC relationship  $R^2 > 0.6$  (black curves in  
408 Fig. 5b). Outlier test removed one recording from the analysis of pupil-LC slopes vs. burstiness in  
409 Fig. 5f.

410  
411 LC burst was defined the same way as spike cluster but with a fixed threshold of 0.1 s to group  
412 spikes. The burstiness of each burst was quantified as the number of spikes in the burst divided  
413 by the total number of spikes in a time window starting 0.5-s prior to the burst onset and ending  
414 at the end of the burst. Results in Fig. 5f-h were robust when LC cluster or burstiness was defined  
415 with other variable or fixed thresholds. For example, when the threshold for cluster was 0.2 s and  
416 the threshold for burstiness was 25% ISI, statistics in Fig. 5f-h would become c.c. = 0.89,  $P =$   
417  $5.6e-4$ ; c.c. = 0.63,  $P = 0.039$ ; c.c. = 0.73,  $P = 0.025$ , respectively. We further tested the  
418 robustness of these results by defining burstiness in a different way, following a recent work  
419 (Senzai et al., 2019). Specifically, burstiness was quantified as the ratio of the number of spikes  
420 in 1 ms – 20% ISI bins (we have tested between 10% and 30%) of the spike autocorrelogram and  
421 the number of spikes in 500 – 1000 ms bins, and the threshold for LC cluster was 0.2 s. Statistics  
422 in Fig. 5f-h would become c.c. = 0.88,  $P = 6.9e-4$ ; c.c. = 0.70,  $P = 0.016$ ; c.c. = 0.73,  $P = 0.025$ ,  
423 respectively.

424  
425  
426  
427  
428  
429  
430  
431  
432  
433  
434  
435  
436  
437  
438  
439  
440  
441  
442  
443  
444  
445  
446  
447  
448  
449  
450  
451  
452  
453  
454  
455  
456  
457

Out of the 9 tracked units in Fig. 4, 4 units were tracked for at least 3 sessions with pupil-LC relationship  $R^2 > 0.6$ , and were included in Fig. 6c-g. To compare the variation of pupil-LC slopes across distinct LC units (population) with the variation of the same unit across sessions, population slopes were redrawn 1000 times to generate a null distribution of variance, and each time the number of samples drawn matched the number of sessions from each unit. The reported P values in Fig. 6c represented the proportion of iterations where the population variance across distinct units was smaller than the across-session variance within individual units.

Data were reported as median (interquartile range, IQR) unless otherwise noted. We did not use statistical methods to predetermine sample sizes. Sample sizes are similar to those reported in the field. We assigned mice to experimental groups arbitrarily, without randomization or blinding. When sample size was  $> 7$ , we used two-tailed sign rank test for paired comparisons and two-tailed rank sum test for unpaired comparisons. When sample size was  $\leq 7$ , we used two-tailed paired or unpaired t-test, respectively, unless otherwise noted.

458 **References**

459

460 Adelman JP, Maylie J, Sah P (2012) Small-conductance Ca<sup>2+</sup>-activated K<sup>+</sup> channels: Form  
461 and function. *Annu Rev Physiol* 74:245–269.

462 Aghajanian GK, Cedarbaum JM, Wang RY (1977) Evidence for norepinephrine-mediated  
463 collateral inhibition of locus coeruleus neurons. *Brain Res* 136:570–577.

464 Andrade R, Aghajanian GK (1984) Locus coeruleus activity in vitro: intrinsic regulation by a  
465 calcium-dependent potassium conductance but not alpha 2-adrenoceptors. *J Neurosci*  
466 4:161–170.

467 Aruljothi K, Marrero K, Zhang Z, Zareian B, Zagha E (2020) Functional Localization of an  
468 Attenuating Filter within Cortex for a Selective Detection Task in Mice. *J Neurosci* 40:JN-  
469 RM-2993-19.

470 Aston-Jones G, Bloom FE (1981) Activity of norepinephrine-containing locus coeruleus neurons  
471 in behaving rats anticipates fluctuations in the sleep-waking cycle. *J Neurosci* 1:876–886  
472 Available at: <http://www.ncbi.nlm.nih.gov/pubmed/7346592>.

473 Aston-Jones G, Cohen JD (2005) An integrative theory of locus coeruleus-norepinephrine  
474 function: Adaptive gain and optimal performance. *Annu Rev Neurosci* 28:403–450.

475 Baral S, Hosseini H, More K, Fabrin TMC, Braun J, Prigge M (2022) Spike-Dependent Dynamic  
476 Partitioning of the Locus Coeruleus Network through Noradrenergic Volume Release in a  
477 Simulation of Nucleus Core. *Brain Sci* 12:728 Available at: [https://www.mdpi.com/2076-  
478 3425/12/6/728](https://www.mdpi.com/2076-3425/12/6/728).

479 Barry JM (2015) Axonal Activity in vivo: Technical considerations and implications for the  
480 exploration of neural circuits in freely moving animals. *Front Neurosci* 9:1–12.

481 Barthó P, Hirase H, Monconduit L, Zugaro M, Harris KD, Buzsáki G (2004) Characterization of  
482 neocortical principal cells and interneurons by network interactions and extracellular  
483 features. *J Neurophysiol* 92:600–608.

484 Berridge CW, Waterhouse BD (2003) The locus coeruleus-noradrenergic system: Modulation of  
485 behavioral state and state-dependent cognitive processes. *Brain Res Rev* 42:33–84  
486 Available at: <http://www.ncbi.nlm.nih.gov/pubmed/12668290>.

487 Borodovitsyna O, Duffy BC, Pickering AE, Chandler DJ (2020) Anatomically and functionally  
488 distinct locus coeruleus efferents mediate opposing effects on anxiety-like behavior.  
489 *Neurobiol Stress* 13:100284 Available at: <https://doi.org/10.1016/j.ynstr.2020.100284>.

490 Breen LA, Burde RM, Loewy AD (1983) Brainstem connections to the Edinger-Westphal  
491 nucleus of the cat: a retrograde tracer study. *Brain Res* 261:303–306.

- 492 Breton-Provencher V, Sur M (2019) Active control of arousal by a locus coeruleus GABAergic  
493 circuit. *Nat Neurosci* 22:218–228 Available at:  
494 <https://www.biorxiv.org/content/early/2018/09/09/412338>.
- 495 Cazettes F, Reato D, Morais JP, Renart A, Mainen ZF (2020) Phasic Activation of Dorsal Raphe  
496 Serotonergic Neurons Increases Pupil Size. *Curr Biol*:1–6.
- 497 Cedarbaum JM, Aghajanian GK (1976) Noradrenergic neurons of the locus coeruleus: inhibition  
498 by epinephrine and activation by the  $\alpha$ -antagonist piperoxane. *Brain Res* 112:413–419.
- 499 Chandler DJ, Gao W-J, Waterhouse BD (2014) Heterogeneous organization of the locus  
500 coeruleus projections to prefrontal and motor cortices. *Proc Natl Acad Sci U S A* 111:6816–  
501 6821.
- 502 Chandler DJ, Jensen P, McCall JG, Pickering AE, Schwarz LA, Totah NK (2019) Redefining  
503 Noradrenergic Neuromodulation of Behavior: Impacts of a Modular Locus Coeruleus  
504 Architecture. *J Neurosci* 39:8239–8249.
- 505 Clewett D, Gasser C, Davachi L (2020) Pupil-linked arousal signals track the temporal  
506 organization of events in memory. *Nat Commun* 11:1–14 Available at:  
507 <http://dx.doi.org/10.1038/s41467-020-17851-9>.
- 508 Egan TM, Henderson G, North RA, Williams JT (1983) Noradrenaline-mediated synaptic  
509 inhibition in rat locus coeruleus neurones. *J Physiol* 345:477–488.
- 510 Eschenko O, Sara SJ (2008) Learning-dependent, transient increase of activity in noradrenergic  
511 neurons of locus coeruleus during slow wave sleep in the rat: Brain stem-cortex interplay  
512 for memory consolidation? *Cereb Cortex* 18:2596–2603.
- 513 Fallon JH, Loughlin SE (1982) Monoamine innervation of the forebrain: Collateralization. *Brain*  
514 *Res Bull* 9:295–307.
- 515 Foote SL, Bloom FE, Aston-Jones G (1983) Nucleus locus ceruleus: new evidence of  
516 anatomical and physiological specificity. *Physiol Rev* 63:844–914 Available at:  
517 <http://www.physiology.org/doi/10.1152/physrev.1983.63.3.844>.
- 518 Gilzenrat MS, Nieuwenhuis S, Jepma M, Cohen JD (2010) Pupil diameter tracks changes in  
519 control state predicted by the adaptive gain theory of locus coeruleus function. *Cogn Affect*  
520 *Behav Neurosci* 10:252–269 Available at:  
521 [http://www.pubmedcentral.nih.gov/articlerender.fcgi?artid=3403821&tool=pmcentrez&rend](http://www.pubmedcentral.nih.gov/articlerender.fcgi?artid=3403821&tool=pmcentrez&rendertype=abstract)  
522 [ertype=abstract](http://www.pubmedcentral.nih.gov/articlerender.fcgi?artid=3403821&tool=pmcentrez&rendertype=abstract) [Accessed July 9, 2014].
- 523 Gold C, Henze DA, Koch C, Buzsáki G (2006) On the origin of the extracellular action potential  
524 waveform: A modeling study. *J Neurophysiol* 95:3113–3128.
- 525 Guido W, Lu SM, Sherman SM (1992) Relative contributions of burst and tonic responses to the

- 526 receptive field properties of lateral geniculate neurons in the cat. *J Neurophysiol* 68:2199–  
527 2211.
- 528 Hickey L, Li Y, Fyson SJ, Watson TC, Perrins R, Hewinson J, Teschemacher a. G, Furue H,  
529 Lumb BM, Pickering a. E (2014) Optoactivation of Locus Coeruleus Neurons Evokes  
530 Bidirectional Changes in Thermal Nociception in Rats. *J Neurosci* 34:4148–4160 Available  
531 at: <http://www.jneurosci.org/cgi/doi/10.1523/JNEUROSCI.4835-13.2014>.
- 532 Hirschberg S, Li Y, Randall A, Kremer EJ, Pickering AE (2017) Functional dichotomy in spinal-  
533 vs prefrontal-projecting locus coeruleus modules splits descending noradrenergic  
534 analgesia from ascending aversion and anxiety in rats. *Elife* 6:1–26.
- 535 Joshi S, Li Y, Kalwani RM, Gold JI (2016) Relationships between Pupil Diameter and Neuronal  
536 Activity in the Locus Coeruleus, Colliculi, and Cingulate Cortex. *Neuron* 89:221–234  
537 Available at: <http://dx.doi.org/10.1016/j.neuron.2015.11.028>.
- 538 Jun JJ et al. (2017) Fully integrated silicon probes for high-density recording of neural activity.  
539 *Nature* 551:232–236 Available at: <http://dx.doi.org/10.1038/nature24636>.
- 540 Kebschull JM, Garcia da Silva P, Reid AP, Peikon ID, Albeanu DF, Zador AM (2016) High-  
541 Throughput Mapping of Single-Neuron Projections by Sequencing of Barcoded RNA.  
542 *Neuron* 91:975–987 Available at: <http://dx.doi.org/10.1016/j.neuron.2016.07.036>.
- 543 Kempadoo KA, Mosharov E V., Choi SJ, Sulzer D, Kandel ER (2016) Dopamine release from  
544 the locus coeruleus to the dorsal hippocampus promotes spatial learning and memory.  
545 *Proc Natl Acad Sci* 113:14835–14840 Available at:  
546 <http://www.pnas.org/lookup/doi/10.1073/pnas.1616515114>.
- 547 Li Y, Hickey L, Perrins R, Werlen E, Patel AA, Hirschberg S, Jones MW, Salinas S, Kremer EJ,  
548 Pickering AE (2016) Retrograde optogenetic characterization of the pontospinal module of  
549 the locus coeruleus with a canine adenoviral vector. *Brain Res* 1641:274–290 Available at:  
550 <http://dx.doi.org/10.1016/j.brainres.2016.02.023>.
- 551 Liu Y, Rodenkirch C, Moskowitz N, Schriver B, Wang Q (2017) Dynamic Lateralization of Pupil  
552 Dilation Evoked by Locus Coeruleus Activation Results from Sympathetic, Not  
553 Parasympathetic, Contributions. *Cell Rep* 20:3099–3112 Available at:  
554 <https://doi.org/10.1016/j.celrep.2017.08.094>.
- 555 Loughlin SE, Foote SL, Fallon JH (1982) Locus coeruleus projections to cortex: Topography,  
556 morphology and collateralization. *Brain Res Bull* 9:287–294.
- 557 Louise Faber ES, Sah P (2003) Calcium-activated potassium channels: Multiple contributions to  
558 neuronal function. *Neuroscientist* 9:181–194.
- 559 Macosko EZ, Basu A, Satija R, Nemes J, Shekhar K, Goldman M, Tirosh I, Bialas AR,

- 560 Kamitaki N, Martersteck EM, Trombetta JJ, Weitz DA, Sanes JR, Shalek AK, Regev A,  
561 McCarroll SA (2015) Highly parallel genome-wide expression profiling of individual cells  
562 using nanoliter droplets. *Cell* 161:1202–1214 Available at:  
563 <http://dx.doi.org/10.1016/j.cell.2015.05.002>.
- 564 Mathis A, Mamidanna P, Cury KM, Abe T, Murthy VN, Mathis MW, Bethge M (2018)  
565 DeepLabCut: markerless pose estimation of user-defined body parts with deep learning.  
566 *Nat Neurosci* 21:1281–1289 Available at: <http://dx.doi.org/10.1038/s41593-018-0209-y>.
- 567 Matschke LA, Rinné S, Snutch TP, Oertel WH, Dolga AM, Decher N (2018) Calcium-activated  
568 SK potassium channels are key modulators of the pacemaker frequency in locus coeruleus  
569 neurons. *Mol Cell Neurosci* 88:330–341 Available at:  
570 <https://doi.org/10.1016/j.mcn.2018.03.002>.
- 571 McBurney-Lin J, Lu J, Zuo Y, Yang H (2019) Locus coeruleus-norepinephrine modulation of  
572 sensory processing and perception: A focused review. *Neurosci Biobehav Rev* 105.
- 573 McBurney-Lin J, Sun Y, Tortorelli LS, Nguyen QAT, Haga-Yamanaka S, Yang H (2020)  
574 Bidirectional pharmacological perturbations of the noradrenergic system differentially affect  
575 tactile detection. *Neuropharmacology* 174.
- 576 McCall JG, Al-Hasani R, Siuda ER, Hong DY, Norris AJ, Ford CP, Bruchas MR (2015) CRH  
577 Engagement of the Locus Coeruleus Noradrenergic System Mediates Stress-Induced  
578 Anxiety. *Neuron* 87:605–620 Available at: <http://dx.doi.org/10.1016/j.neuron.2015.07.002>.
- 579 Megemont M, McBurney-Lin J, Yang H (2022) Pupil diameter is not an accurate real-time  
580 readout of locus coeruleus activity. *Elife* 11:1–17 Available at:  
581 <https://elifesciences.org/articles/70510>.
- 582 Mulvey B, Bhatti DL, Gyawali S, Lake AM, Kriaucionis S, Ford CP, Bruchas MR, Heintz N,  
583 Dougherty JD (2018) Molecular and Functional Sex Differences of Noradrenergic Neurons  
584 in the Mouse Locus Coeruleus. *Cell Rep* 23:2225–2235.
- 585 Murphy PR, O’Connell RG, O’Sullivan M, Robertson IH, Balsters JH (2014) Pupil diameter  
586 covaries with BOLD activity in human locus coeruleus. *Hum Brain Mapp* 35:4140–4154.
- 587 Patel AJ, Honoré E, Lesage F, Fink M, Romey G, Lazdunski M (1999) Inhalational anesthetics  
588 activate two-pore-domain background K<sup>+</sup> channels. *Nat Neurosci* 2:422–426.
- 589 Plummer NW, Scappini EL, Smith KG, Tucker CJ, Jensen P (2017) Two Subpopulations of  
590 Noradrenergic Neurons in the Locus Coeruleus Complex Distinguished by Expression of  
591 the Dorsal Neural Tube Marker Pax7. *Front Neuroanat* 11:1–11 Available at:  
592 <http://journal.frontiersin.org/article/10.3389/fnana.2017.00060/full>.
- 593 Poe GR, Foote S, Eschenko O, Johansen JP, Bouret S, Aston-Jones G, Harley CW, Manahan-

- 594 Vaughan D, Weinshenker D, Valentino R, Berridge C, Chandler DJ, Waterhouse B, Sara  
595 SJ (2020) Locus coeruleus: a new look at the blue spot. *Nat Rev Neurosci* Available at:  
596 <http://dx.doi.org/10.1038/s41583-020-0360-9>.
- 597 Preuschoff K, 't Hart BM, Einhäuser W (2011) Pupil dilation signals surprise: Evidence for  
598 noradrenaline's role in decision making. *Front Neurosci* 5:1–12.
- 599 Privitera M, Ferrari KD, von Ziegler LM, Sturman O, Duss SN, Floriou-Servou A, Germain P,  
600 Vermeiren Y, Wyss MT, De Deyn PP, Weber B, Bohacek J (2020) A complete pupillometry  
601 toolbox for real-time monitoring of locus coeruleus activity in rodents. *Nat Protoc* Available  
602 at: <http://dx.doi.org/10.1038/s41596-020-0324-6>.
- 603 Rajkowski J, Kubiak P, Aston-Jones G (1994) Locus coeruleus activity in monkey: Phasic and  
604 tonic changes are associated with altered vigilance. *Brain Res Bull* 35:607–616.
- 605 Rall W, Shepherd GM (1968) Theoretical reconstruction of field potentials and dendrodendritic  
606 synaptic interactions in olfactory bulb. *J Neurophysiol* 31:884–915.
- 607 Redish AD (2014) MClust Spike sorting toolbox Documentation for version 4.4. Available at:  
608 <http://redishlab.neuroscience.umn.edu/MClust/MClust-4.4.pdf>.
- 609 Reimer J, McGinley MJ, Liu Y, Rodenkirch C, Wang Q, McCormick DA, Tolias AS (2016) Pupil  
610 fluctuations track rapid changes in adrenergic and cholinergic activity in cortex. *Nat*  
611 *Commun* 7:1–7 Available at: <http://dx.doi.org/10.1038/ncomms13289>.
- 612 Robertson SD, Plummer NW, de Marchena J, Jensen P (2013) Developmental origins of central  
613 norepinephrine neuron diversity. *Nat Neurosci* 16:1016–1023 Available at:  
614 <http://www.ncbi.nlm.nih.gov/pubmed/23852112>.
- 615 Sara SJ, Bouret S (2012) Orienting and Reorienting: The Locus Coeruleus Mediates Cognition  
616 through Arousal. *Neuron* 76:130–141 Available at:  
617 <http://dx.doi.org/10.1016/j.neuron.2012.09.011>.
- 618 Schoonover CE, Ohashi SN, Axel R, Fink AJP (2021) Representational drift in primary olfactory  
619 cortex. *Nature* 594:541–546 Available at: <http://dx.doi.org/10.1038/s41586-021-03628-7>.
- 620 Schwarz LA, Miyamichi K, Gao XJ, Beier KT, Weissbourd B, DeLoach KE, Ren J, Ibanes S,  
621 Malenka RC, Kremer EJ, Luo L (2015) Viral-genetic tracing of the input–output  
622 organization of a central noradrenaline circuit. *Nature* 524:88–92 Available at:  
623 <http://www.nature.com/doi/10.1038/nature14600>.
- 624 Senzai Y, Fernandez-Ruiz A, Buzsáki G (2019) Layer-Specific Physiological Features and  
625 Interlaminar Interactions in the Primary Visual Cortex of the Mouse. *Neuron* 101:500-  
626 513.e5.
- 627 Shekhar K, Lapan SW, Whitney IE, Tran NM, Macosko EZ, Kowalczyk M, Adiconis X, Levin JZ,



- 628 Nemesh J, Goldman M, McCarroll SA, Cepko CL, Regev A, Sanes JR (2016)  
629 Comprehensive Classification of Retinal Bipolar Neurons by Single-Cell Transcriptomics.  
630 Cell 166:1308-1323.e30 Available at: <http://dx.doi.org/10.1016/j.cell.2016.07.054>.
- 631 Sun SH, Almasi A, Yunzab M, Zehra S, Hicks DG, Kameneva T, Ibbotson MR, Meffin H (2021)  
632 Analysis of extracellular spike waveforms and associated receptive fields of neurons in cat  
633 primary visual cortex. J Physiol 599:2211–2238 Available at:  
634 <https://onlinelibrary.wiley.com/doi/10.1113/JP280844>.
- 635 Tervo DGR, Hwang BY, Viswanathan S, Gaj T, Lavzin M, Ritola KD, Lindo S, Michael S,  
636 Kuleshova E, Ojala D, Huang CC, Gerfen CR, Schiller J, Dudman JT, Hantman AW,  
637 Looger LL, Schaffer D V., Karpova AY (2016) A Designer AAV Variant Permits Efficient  
638 Retrograde Access to Projection Neurons. Neuron 92:372–382 Available at:  
639 <http://dx.doi.org/10.1016/j.neuron.2016.09.021>.
- 640 Totah NK, Neves RM, Panzeri S, Logothetis NK, Eschenko O (2018) The Locus Coeruleus Is a  
641 Complex and Differentiated Neuromodulatory System. Neuron 99:1055-1068.e6 Available  
642 at: <https://linkinghub.elsevier.com/retrieve/pii/S0896627318306354>.
- 643 Uematsu A, Tan BZ, Ycu EA, Cuevas JS, Koivumaa J, Junyent F, Kremer EJ, Witten IB,  
644 Deisseroth K, Johansen JP (2017) Modular organization of the brainstem noradrenaline  
645 system coordinates opposing learning states. Nat Neurosci 20:1602–1611 Available at:  
646 <http://www.nature.com/doi/10.1038/nn.4642>.
- 647 Varazzani C, San-Galli a., Gilardeau S, Bouret S (2015) Noradrenaline and Dopamine Neurons  
648 in the Reward/Effort Trade-Off: A Direct Electrophysiological Comparison in Behaving  
649 Monkeys. J Neurosci 35:7866–7877 Available at:  
650 <http://www.jneurosci.org/cgi/doi/10.1523/JNEUROSCI.0454-15.2015>.
- 651 Wagner-Altendorf TA, Fischer B, Roeper J (2019) Axonal projection-specific differences in  
652 somatodendritic  $\alpha 2$  autoreceptor function in locus coeruleus neurons. Eur J Neurosci  
653 50:3772–3785.
- 654 Waterhouse BD, Border B, Wahl L, Mihailoff GA (1993) Topographic organization of rat locus  
655 coeruleus and dorsal raphe nuclei: Distribution of cells projecting to visual system  
656 structures. J Comp Neurol 336:345–361.
- 657 Yang H, Bari BA, Cohen JY, O'Connor DH (2021) Locus coeruleus spiking differently correlates  
658 with S1 cortex activity and pupil diameter in a tactile detection task. Elife 10:1–14 Available  
659 at: <https://elifesciences.org/articles/64327>.
- 660 Yang H, Kwon SE, Severson KS, O'Connor DH (2016) Origins of choice-related activity in  
661 mouse somatosensory cortex. Nat Neurosci 19:127–134 Available at:

- 662 <http://www.nature.com/doi/10.1038/n.4183>.
- 663 Zhao W, Zhao S, Zhu T, Ou M, Zhang D, Sun H, Liu J, Chen X, Hemmings HC, Zhou C (2021)
- 664 Isoflurane Suppresses Hippocampal High-frequency Ripples by Differentially Modulating
- 665 Pyramidal Neurons and Interneurons in Mice. *Anesthesiology*:122–135.
- 666 Zingg B, Peng B, Huang J, Tao HW, Zhang LI (2020) Synaptic Specificity and Application of
- 667 Anterograde Trans-Synaptic AAV for Probing Neural Circuitry. *J Neurosci* 40:JN-RM-2158-
- 668 19.
